# Supplementary material for: Charitable Food Systems’ Capacity to Address Food Insecurity: An Australian Capital City Audit
Source: Int J Environ Res Public Health. 2018 Jun 12;15(6):1249. doi: 10.3390/ijerph15061249 (PMC6025598; doi:10.3390/ijerph15061249)
Supplement: Supplementary file 1 [file ijerph-15-01249-s001.pdf]

**Supplementary Table S1. Characteristics of Charitable Food System Indirect Service organisations servicing or located in the inner-city Perth**

| <b>Name</b>                 | <b>Foodbank WA</b>                                                                                                                                                        | <b>OzHarvest [38]</b>                                                                                                                                             | <b>Food Rescue WA [39] and Second Bite</b>                                                                                                                                                               |
|-----------------------------|---------------------------------------------------------------------------------------------------------------------------------------------------------------------------|-------------------------------------------------------------------------------------------------------------------------------------------------------------------|----------------------------------------------------------------------------------------------------------------------------------------------------------------------------------------------------------|
| <b>Type of organisation</b> | Food banking                                                                                                                                                              | Food rescue                                                                                                                                                       | Food rescue                                                                                                                                                                                              |
| <b>Purpose</b>              | <i>“...fight hunger in Western Australia by providing <b>quality food to people in need</b> and by delivering food education that promotes healthy eating” [36] (p2).</i> | To stop food going to waste...collect <b>quality surplus food</b> from commercial outlets and deliver it directly to charities supporting <b>people in need</b> . | <i>“alleviate hunger in WA by rescuing perishable, fresh and nutritious food from cafes, caterers, supermarkets and wholesalers and delivering it to disadvantage and vulnerable people” [37] (p 26)</i> |
| <b>Food distribution</b>    | Collect from large retailers, farmers and bank or prepare it for <i>DS</i> to collect.                                                                                    | Collect food from commercial outlets and deliver it to <i>DS</i> .                                                                                                | Collect food from supermarkets, sort and repack it and deliver it to <i>DS</i> .                                                                                                                         |
| <b>Facilities</b>           | Large custom built premises (commercial kitchen, dry and cold storage (refrigerator and freezer))                                                                         | No sorting or storage capacity so distribute immediately                                                                                                          | Refrigerated and freezer storage space premises                                                                                                                                                          |
| <b>Location</b>             | 27 km from CBD at the airport                                                                                                                                             | Store vans inner-city                                                                                                                                             | 10 km from CBD                                                                                                                                                                                           |
| <b>Transport</b>            | Fleet of trucks                                                                                                                                                           | Two vans                                                                                                                                                          | Three vans (two cargo carts)                                                                                                                                                                             |
| <b>Length of operation</b>  | 21 years                                                                                                                                                                  | 2 years (2014)                                                                                                                                                    | 6 years (2010)                                                                                                                                                                                           |
| <b>Nutrition capacity</b>   |                                                                                                                                                                           |                                                                                                                                                                   |                                                                                                                                                                                                          |
| Accept unhealthy            | Yes                                                                                                                                                                       | Yes                                                                                                                                                               | No                                                                                                                                                                                                       |
| Nutrition policy            | No                                                                                                                                                                        | No                                                                                                                                                                | No                                                                                                                                                                                                       |
| Nutrition training          | None inner city Perth                                                                                                                                                     | 2 Sessions in last year                                                                                                                                           | None                                                                                                                                                                                                     |
| Food safety                 | Train food preparation staff                                                                                                                                              | Do not accept unsafe food                                                                                                                                         | Do not accept unsafe food                                                                                                                                                                                |
| Food safety audits          | Regular government food safety audits                                                                                                                                     | Not required under Food Act                                                                                                                                       | Not required under Food Act                                                                                                                                                                              |
| <b>Funding</b>              | 2017 [37] (AUD\$)                                                                                                                                                         |                                                                                                                                                                   |                                                                                                                                                                                                          |
| Type                        |                                                                                                                                                                           |                                                                                                                                                                   | Philanthropy                                                                                                                                                                                             |
| Statewide Total             | 8.63 million                                                                                                                                                              |                                                                                                                                                                   |                                                                                                                                                                                                          |
| Handling fee/kg food        | 3.78 million                                                                                                                                                              |                                                                                                                                                                   |                                                                                                                                                                                                          |
| Grants                      | 2.44 million                                                                                                                                                              |                                                                                                                                                                   |                                                                                                                                                                                                          |
| Sponsorship/donors          | 1.29 million                                                                                                                                                              |                                                                                                                                                                   |                                                                                                                                                                                                          |
| Expenditure on food         | 772,385 (8.95%)                                                                                                                                                           |                                                                                                                                                                   |                                                                                                                                                                                                          |
| Healthy Food For All        | 592,018 (6.86%)                                                                                                                                                           |                                                                                                                                                                   |                                                                                                                                                                                                          |
| <b>Funding source</b>       | Corporate, private donations and government grants                                                                                                                        | Corporate donors                                                                                                                                                  |                                                                                                                                                                                                          |

**Supplementary Table S1. Characteristics of Charitable Food System Indirect Service organisations servicing or located in the inner-city Perth**

|                         |                                                                                                                                                         |                                                                                                                                  |                                                                                                                    |  |
|-------------------------|---------------------------------------------------------------------------------------------------------------------------------------------------------|----------------------------------------------------------------------------------------------------------------------------------|--------------------------------------------------------------------------------------------------------------------|--|
| <b>Workforce</b>        |                                                                                                                                                         |                                                                                                                                  |                                                                                                                    |  |
| Paid staff (n)          | 50 FTE                                                                                                                                                  | 6                                                                                                                                | 2                                                                                                                  |  |
| Volunteers              | 192 week plus 785 corporate /year                                                                                                                       | 150 (80 drivers)                                                                                                                 | 100                                                                                                                |  |
| Staff:volunteer ratio   | 1:45                                                                                                                                                    | 1:25                                                                                                                             | 1:50                                                                                                               |  |
| Nutrition workforce (n) | (n)                                                                                                                                                     | (n)                                                                                                                              | (n)                                                                                                                |  |
| Nutritionists           | 10 (not inner-city)                                                                                                                                     | 1 nutrition coordinator (casual)                                                                                                 | nil                                                                                                                |  |
| Health promotion        | 2 (not inner-city)                                                                                                                                      | nil                                                                                                                              | nil                                                                                                                |  |
| Student placements      | Yes, nutrition.                                                                                                                                         | Yes, hospitality and nutrition.                                                                                                  | nil                                                                                                                |  |
| Chef                    | 1                                                                                                                                                       | 1 (casual)                                                                                                                       | nil                                                                                                                |  |
| <b>Nutrition focus</b>  | Yes, Key Staples Program                                                                                                                                | ?                                                                                                                                | Yes                                                                                                                |  |
| Accept unhealthy food   | Yes                                                                                                                                                     | Yes                                                                                                                              | Yes                                                                                                                |  |
| <b>Food</b>             |                                                                                                                                                         |                                                                                                                                  |                                                                                                                    |  |
| Amount / year(kg)       | 2,800,000                                                                                                                                               | 348,627                                                                                                                          | 478,000                                                                                                            |  |
| Meal equivalents        | 5,602,080 meals (WA)                                                                                                                                    | na                                                                                                                               |                                                                                                                    |  |
| Recipients per week     | 11,800 + 22,864 emergency meals (WA)                                                                                                                    | na                                                                                                                               | 5,500                                                                                                              |  |
| Fresh fruit, veg (kg)   | 70,000                                                                                                                                                  | na                                                                                                                               | 99%                                                                                                                |  |
| Distribute to           | 510 DS and 432 schools in 2014/15.                                                                                                                      | 30-45 DS inner-city Perth 84 DS                                                                                                  | 69 DS                                                                                                              |  |
| Procurement method      | Partnerships donations with the local food and grocery industry                                                                                         | Partnerships donations, collect from inner city food businesses                                                                  | Partnerships donations, collect from inner city food businesses                                                    |  |
| Food retrieval intent   | To reduce food waste and purchase                                                                                                                       | To reduce food waste                                                                                                             | To reduce food waste                                                                                               |  |
| Description             | <i>"out of specification, close to its use by date, incorrect labelling, damaged packaging, as well as excess stock or deleted lines."</i> [37] (pg 8). | Collect perishable food from retailers and venues such as cafes, restaurants, supermarkets (75% of food), caterers and bakeries. | Collect perishable food from retailers and venues such as cafes, restaurants, supermarkets, caterers and bakeries. |  |
| Packaged                | 74%                                                                                                                                                     | None                                                                                                                             | 1%                                                                                                                 |  |
| Perishable              | 26%                                                                                                                                                     | All, fruit and vegetables, frozen meals, sushi, prepared sandwiches and mini-quiches.                                            | 99% fresh fruit and vegetables, prepared sandwiches, rolls, wraps and pastries                                     |  |
